**Hypoxemia in Ether Anesthesia.** By YAJÖ KULHIA. Lieksa, Finland. Paper. Pp. 98 with illustrations. Mercatorin Kirjapaino, Helsinki, Finland, 1962.

Following a fairly extensive review of pertinent literature appearing before 1955 which dealt with oxygen deficiency and anesthesia, the author presents results of oximetric studies made in 1947-1948 at the Deaconess' Hospital, Helsinki, during anesthesia on 118 patients undergoing mainly major surgical procedures. Open mask ether was used in most cases with a few instances of the use of the Turcos machine, Ombredanne mask, instillation mask, or local or intravenous methods. This study was conducted under grants from the Licensing Board and the Finnish Medical Association Duodecim. Berg's photo-cell oximeter was employed.

This monograph is replete with numerous tables

and oximetric tracings which add greatly to its value. The addition of concomitant explanatory notations to the tracings showing marked falls in blood oxygen saturation, would have enhanced understanding and educational worth of these tracings. That the majority of these anesthetics were administered by trainees undoubtedly explains the high incidence of complications. Unfortunately, in scattered sites in the text, some of the author's statistics are not in agreement with each other. There are occasional typographical and translation errors.

The author's investigative reports substantiate observations made by others that certain surgical and anesthetic procedures may cause serious hypoxemia. Every anesthesiologist and surgeon should be acutely aware of the potential hypoxic hazards presented in this publication.

H. M. LIVINGSTONE, M.D.

### Other Books Received

**L'Anestesia Per Il Taglio Cesareo.** By PROF. CARLO ROSSANO, Ospedale Civile Umberto I, Ancona, Italy. Preface by Prof. A. M. Dogliotti. Paper. Pp. 245, with 56 figures. Tipografia Bellomo, Ancona, Italy, 1962.

**Anesthesia Abstracts. Volume 60.** By JOHN S. LUNDY, M.D., AND FLORENCE A. MCQUILLEN. Fabricoid. \$4.00. Pp. 274. Burgess Publishing Co., Minneapolis, Minnesota, 1963.

**The Care of Minor Hand Injuries. SECOND EDITION.** By ADRIAN E. FLATT, M.A., M.D., F.R.C.S., F.A.C.S., Associate Professor of Orthopedic Surgery, University of Iowa, Iowa City, Iowa; Hunterian Professor, Royal College of Surgeons of England. Cloth. \$10.50. Pp. 274, with 120 figures. C. V. Mosby Company, St. Louis, 1963.

**Human Anatomy: A Lecture and Laboratory Manual.** By WILLIAM J. McCAULEY, Associate Prof. of Zoology, University of Arizona, Tucson, Arizona. Paper. \$3.50. Pp. 80, with illustrations. Burgess Publishing Co., Minneapolis, Minnesota, 1962.

**Laboratory Manual of Human Anatomy and Physiology. SECOND EDITION.** By SIGMUND GROLLMAN, Associate Prof. of Zoology, University of Maryland, College Park, Maryland. Paper. \$4.25. Pp. 188 with illustrations. Burgess Publishing Co., Minneapolis, Minnesota, 1962.

**Nursing Care of Patients with Urologic Diseases.** By JANET R. SAWYER, R.N., A.M., In-

structor, School of Education, Department of Nurse Education, New York University, New York City. Cloth. \$7.75. Pp. 363, with 93 figures. C. V. Mosby Co., St. Louis, 1963.

**Surgical Diseases of the Lung.** By BUFORD H. BURCH, M.A., M.D., Chief of Thoracic Surgery, Chest Center, Patton State Hospital, Patton, California, AND ARTHUR C. MILLER, M.S., M.D., F.A.C.S., Division of Surgery, College of Medical Evangelists, Loma Linda, California. Cloth. \$8.50. Pp. 128 with 60 illustrations. Charles C Thomas, Publisher, Springfield, Ill., 1961.

**Toxicoin.** An International Journal Devoted to the Exchange of Knowledge on the Toxins Derived from the Tissues of Plants and Animals. Official Journal of the International Society on Toxinology. Volume 1, Number 1, October 1962. Editors: Dr. F. E. Russell, Laboratory of Neurological Research, Loma Linda University School of Medicine, Los Angeles County Hospital, and Dr. P. R. Saunders, Department of Pharmacology, University of Southern California School of Medicine. Annual subscription rates: For libraries, government agencies, industrial establishments, etc. \$30.00; for individuals, \$15.00; for members of International Society on Toxicology, \$10.00. Pergamon Press Ltd., Headington Hill Hall, Oxford, England, and New York City.

**Triumph Over Pain.** By RENE FUELOEF-MILLER. Paperback. \$2.35. Pp. 438. Charter edition published November 1962. The Bobbs-Merrill Company, Inc., Indianapolis and New York, 1963.
